# Supplementary material for: Epidemiologic Features of NSCLC Gene Alterations in Hispanic Patients from Puerto Rico
Source: PubMed Central journal article supplement (PMC7761356; doi:10.3390/cancers12123492), 2020-11-24
Supplement: cancers-12-03492-s001.pdf [file cancers-12-03492-s001.pdf]

# Supplementary Materials: Epidemiologic Features of NSCLC Gene Alterations in Hispanic Patients from Puerto Rico

Ruifang Zheng, Zhiwei Yin, Albert Alhatem, Derek Lyle, Bei You, Andrew S. Jiang, Dongfang Liu, Zsolt Jobbagy, Qing Wang, Seena Aisner and Jie-Gen Jiang

**Table S1.** *EGFR* mutations in different histologic types.

| Histologic Types        | <i>EGFR</i> Positive | <i>EGFR</i> Negative | %     |
|-------------------------|----------------------|----------------------|-------|
| Adenocarcinoma          | 169                  | 431                  | 28.2% |
| Squamous cell carcinoma | 6                    | 105                  | 5.4%  |
| Other types             | 12                   | 59                   | 16.9% |

**Table S2.** *MET* mutations detected by NGS.

| Patient# | Age (years)/Gender | Mutation site       | Mutation type |
|----------|--------------------|---------------------|---------------|
| 1        | 76/F               | c.3039G>C; p.M1013I | MISSENSE      |
| 2        | 65/M               | c.1771C>T; p.R591W  | MISSENSE      |
| 3        | 57/F               | c.1039G>A; p.A347T  | MISSENSE      |
| 4        | 68/F               | c.2201G>A; p.S734N  | MISSENSE      |
| 5        | 76/M               | c.1393-2A>C;        | SNP           |

**Table S3.** Clinical data of 55 patients with passenger gene mutations.

| Age (years) | Gender | Histopathology diagnosis                                                          |
|-------------|--------|-----------------------------------------------------------------------------------|
| 65          | F      | Metastatic adenocarcinoma of lung primary                                         |
| 78          | M      | Squamous carcinoma of the lung                                                    |
| 76          | M      | Adenocarcinoma of the lung                                                        |
| 68          | F      | Adenocarcinoma of the lung, well differentiated                                   |
| 65          | M      | Squamous cell carcinoma of the lung                                               |
| 67          | F      | Adenocarcinoma of the lung with papillary features                                |
| 80          | F      | Adenocarcinoma of the lung                                                        |
| 75          | M      | Mucinous adenocarcinoma of the lung                                               |
| 65          | F      | Squamous cell carcinoma of the lung                                               |
| 72          | F      | Adenocarcinoma of the lung                                                        |
| 57          | F      | Metastatic adenocarcinoma of lung primary                                         |
| 77          | F      | Metastatic adenocarcinoma of lung primary                                         |
| 60          | M      | Metastatic adenocarcinoma of lung primary                                         |
| 65          | M      | Metastatic adenocarcinoma of lung primary, moderately differentiated              |
| 72          | F      | Adenocarcinoma of the lung                                                        |
| 67          | F      | Non-small cell type carcinoma of the lung, adenocarcinoma subtype.                |
| 54          | M      | Metastatic large cell carcinoma of lung primary, with features of adenocarcinoma. |
| 72          | M      | Squamous cell carcinoma of the lung                                               |
| 84          | F      | Adenocarcinoma of the lung, moderately differentiated                             |
| 85          | F      | Mucinous adenocarcinoma of the lung with <i>FGFR2-TACC2</i> translocation         |
| 81          | M      | Adenocarcinoma of the lung, moderately differentiated                             |

|    |   |                                                                             |
|----|---|-----------------------------------------------------------------------------|
| 63 | F | Adenocarcinoma of the lung                                                  |
| 58 | F | Adenocarcinoma of the lung, well-differentiated                             |
| 76 | M | Adenocarcinoma of the lung, moderately differentiated                       |
| 64 | M | Metastatic adenocarcinoma of lung primary.                                  |
| 79 | M | Metastatic adenocarcinoma of lung primary                                   |
| 84 | F | Adenocarcinoma of lung primary.                                             |
| 68 | F | Adenocarcinoma of the lung                                                  |
| 72 | M | Adenocarcinoma of the lung, moderately differentiated                       |
| 46 | M | Adenocarcinoma of bronchogenic origin                                       |
| 70 | M | Squamous carcinoma of the lung, moderately differentiated                   |
| 83 | M | Non-small cell lung carcinoma, adenocarcinoma subtype.                      |
| 64 | M | Squamous cell carcinoma of the lung, moderately differentiated              |
| 51 | F | Adenocarcinoma of the lung, well differentiated                             |
| 31 | F | Adeno-squamous cell carcinoma of the lung                                   |
| 39 | F | Adenocarcinoma of lung origin                                               |
| 79 | F | Adenocarcinoma of the lung                                                  |
| 78 | M | Adenocarcinoma of the lung                                                  |
| 46 | M | Carcinosarcoma of the lung                                                  |
| 61 | M | Adenocarcinoma of the lung, poorly differentiated                           |
| 76 | M | Non-small cell lung carcinoma, favor adenocarcinoma.                        |
| 50 | F | Non-small cell lung carcinoma, favoring adenocarcinoma (bronchio-alveolar). |
| 66 | F | Adenocarcinoma of the lung                                                  |
| 68 | F | Mucinous adenocarcinoma of lung origin                                      |
| 70 | F | Adenocarcinoma of the lung                                                  |
| 86 | F | Non-small cell lung carcinoma, favor adenocarcinoma.                        |
| 75 | M | Non-small cell lung carcinoma, favor squamous cell carcinoma.               |
| 69 | F | Non-small cell carcinoma, favor adenocarcinoma.                             |
| 60 | F | Neuroendocrine carcinoma of the lung, well differentiated                   |
| 67 | F | Non-small cell lung carcinoma, poorly differentiated                        |
| 71 | M | Metastatic adenocarcinoma of lung primary.                                  |
| 50 | F | Adenocarcinoma of the lung                                                  |
| 85 | M | Squamous cell carcinoma of the lung                                         |
| 66 | F | Adenocarcinoma of the lung, well-differentiated                             |
| 55 | M | Metastatic adenocarcinoma of lung primary.                                  |

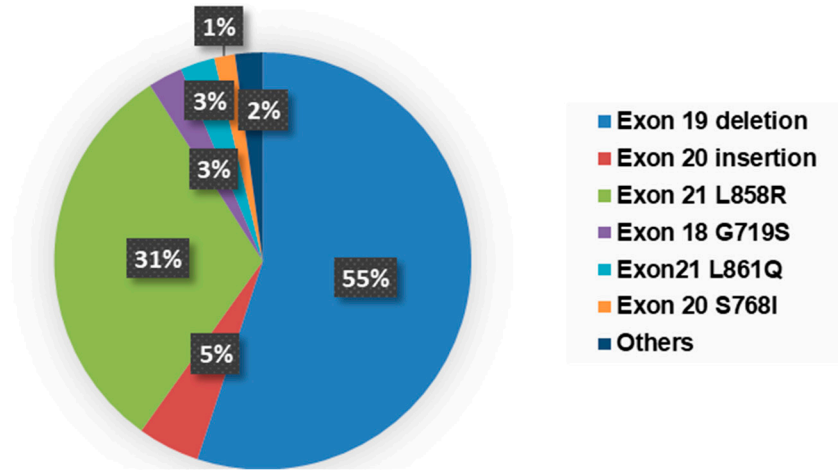

Figure S1: EGFR mutation composition

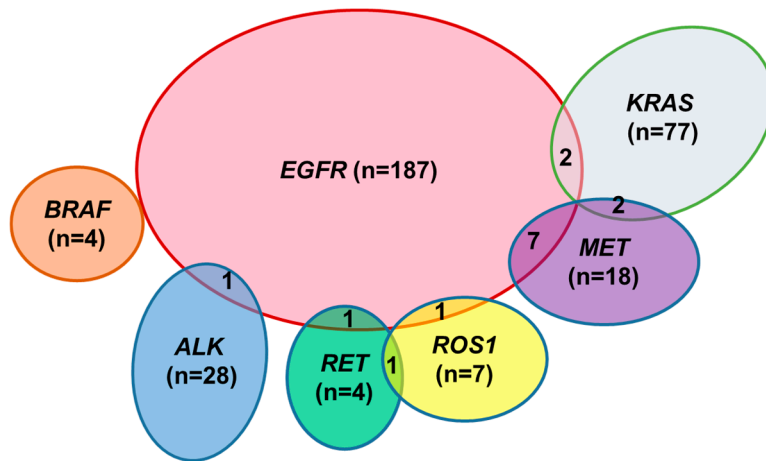

Figure S2. Overlap of driver gene alterations.

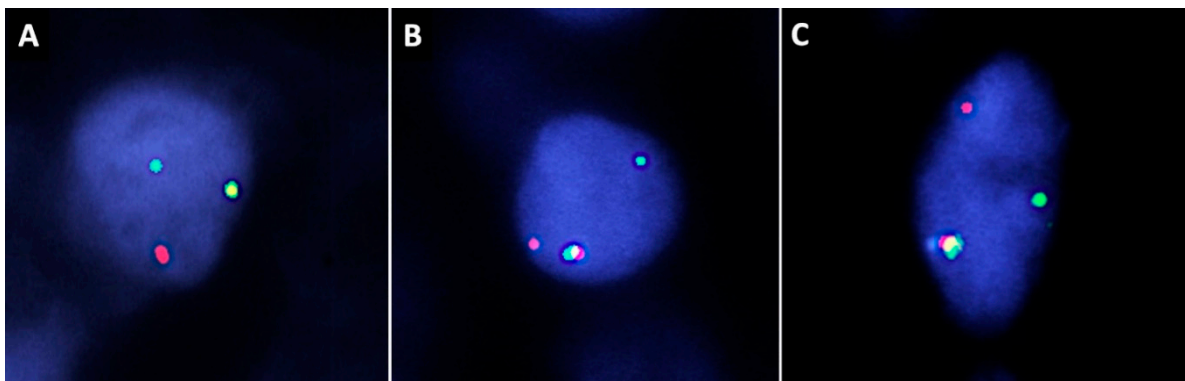

**Figure S3.** Representative FISH figures. (A) *ALK* rearrangement-one red, one green, and one yellow with the *ALK* BA probe; (B) *ROS1* rearrangement-one red, one green, and one yellow with the *ROS1* BA probe; (C) *RET* rearrangement-one red, one green, and one yellow with the *RET* BA probe; Separate red and green signals indicate rearrangements. The yellow signals indicate intact genes with no rearrangements.
